# Supplementary material
Source: PubMed Central journal article supplement (PMC6118636)
Supplement: jci-128-122095-s317.pdf [file jci-128-122095-s317.pdf]

## Supplementary Figures 1-5

Li *et al*,

### Polymerase-Mediated Ultramutagenesis in Mice Produces Diverse Cancers with High Mutational Load

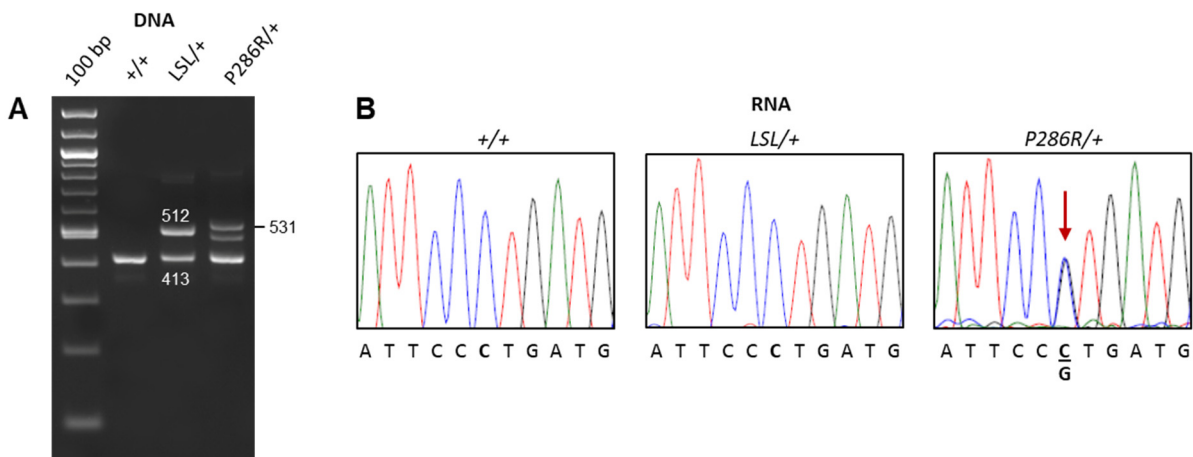

**Supplementary Fig. 1.** Molecular validation of allele function. A) Multiplex genotyping protocol (tail DNA) distinguished between + (wt), *LSL* (*LSL-Pole<sup>P286R</sup>*), and *P286R* (*Pole<sup>P286R</sup>*) alleles. Product sizes (bp) are shown. The *P286R* product typically appears as a doublet but this does not affect interpretation of genotyping. B) RT-PCR using intron-spanning primers to characterize allele expression at RNA level. There is no expression from the *LSL* allele, as expected, whereas the *P286R* and wild-type alleles result in equal expression at that RNA level.

**A**

|      | 500 cells regular media<br>↓ |            | 10 <sup>6</sup> cells, 60μM 6-TG<br>↓ |            |
|------|------------------------------|------------|---------------------------------------|------------|
|      | plating efficiency           |            | 6-TG resistant colonies               |            |
|      | <i>P286R/+</i>               | <i>+/+</i> | <i>P286R/+</i>                        | <i>+/+</i> |
|      | 140                          | 124        | 7                                     | 0          |
|      | 131                          | 129        | 10                                    | 0          |
|      | 142                          | 115        | 9                                     | 0          |
|      | 138                          | 130        | 5                                     | 0          |
|      | 120                          | 126        | 8                                     | 0          |
| mean | 134                          | 125        | 7.8                                   | 0          |

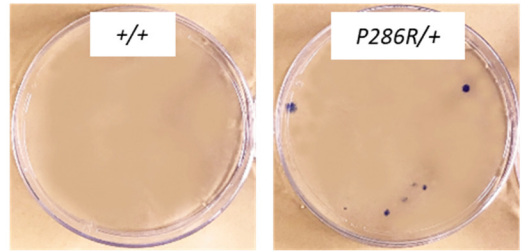

Observed *HPRT1* mutation frequency:  
*+/+* : 0  
*P286R/+* :  $2.9 \times 10^{-5}$   
 P value, unpaired T test:  $p < 0.0001$

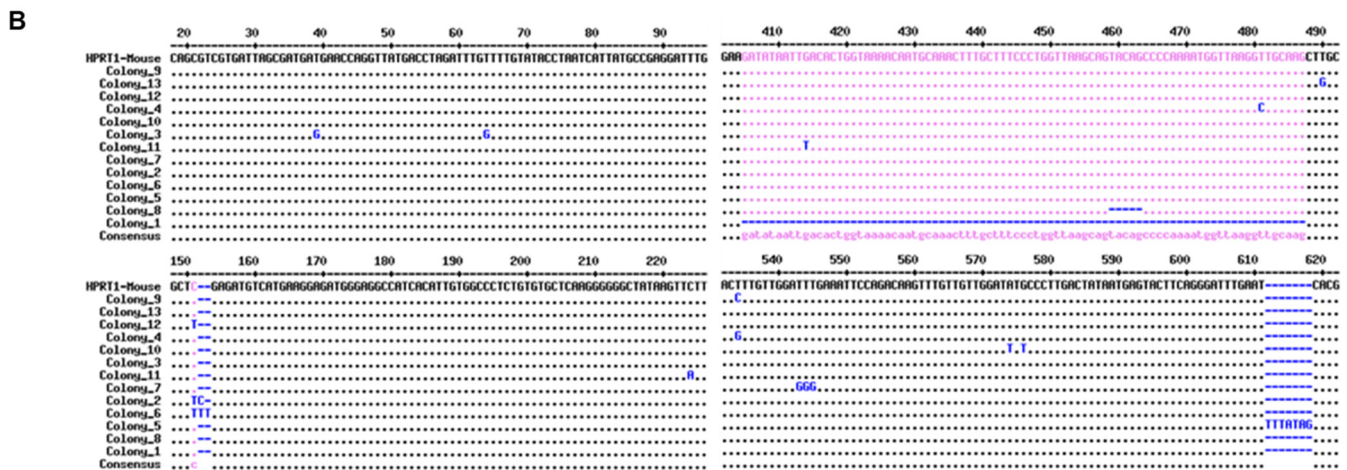

**Supplementary Fig. 2.** 6-TG selection of passage 20 MEFs. A) Plating efficiency and resistant colonies. Each row represents a separate plate (selection of 10<sup>6</sup> cells). B) cDNA sequencing of *HPRT1* locus reveals mutations in each of 13 independent 6-TG resistant colonies; most are nonsynonymous substitutions. Only regions of the cDNA with mutations are shown.

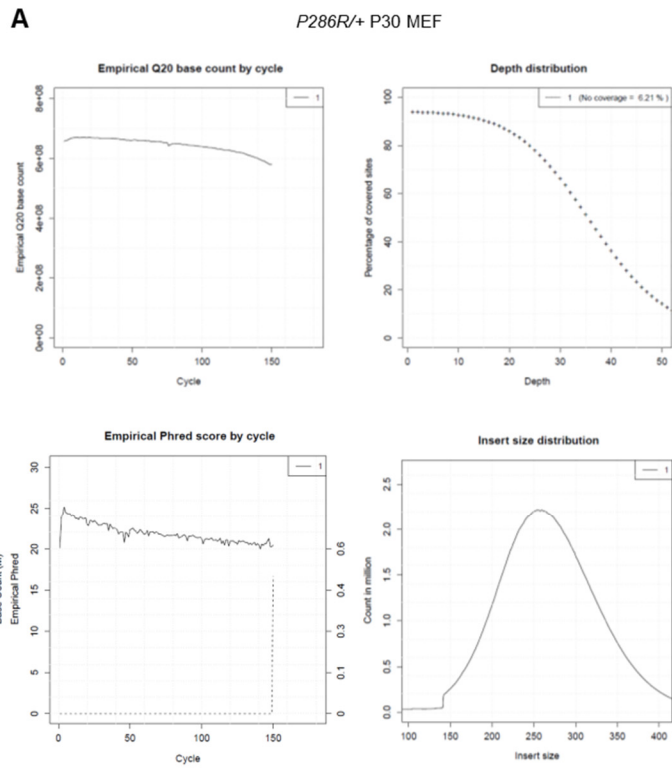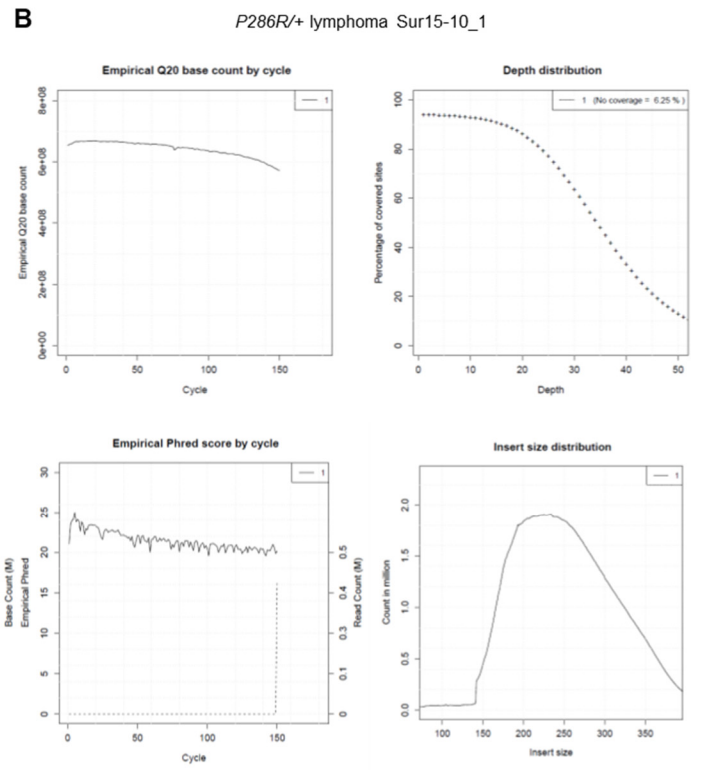

**Supplementary Fig. 3.** General quality control metrics of WGS data. Representative analyses are provided for two of the samples; metrics were comparable across all samples.

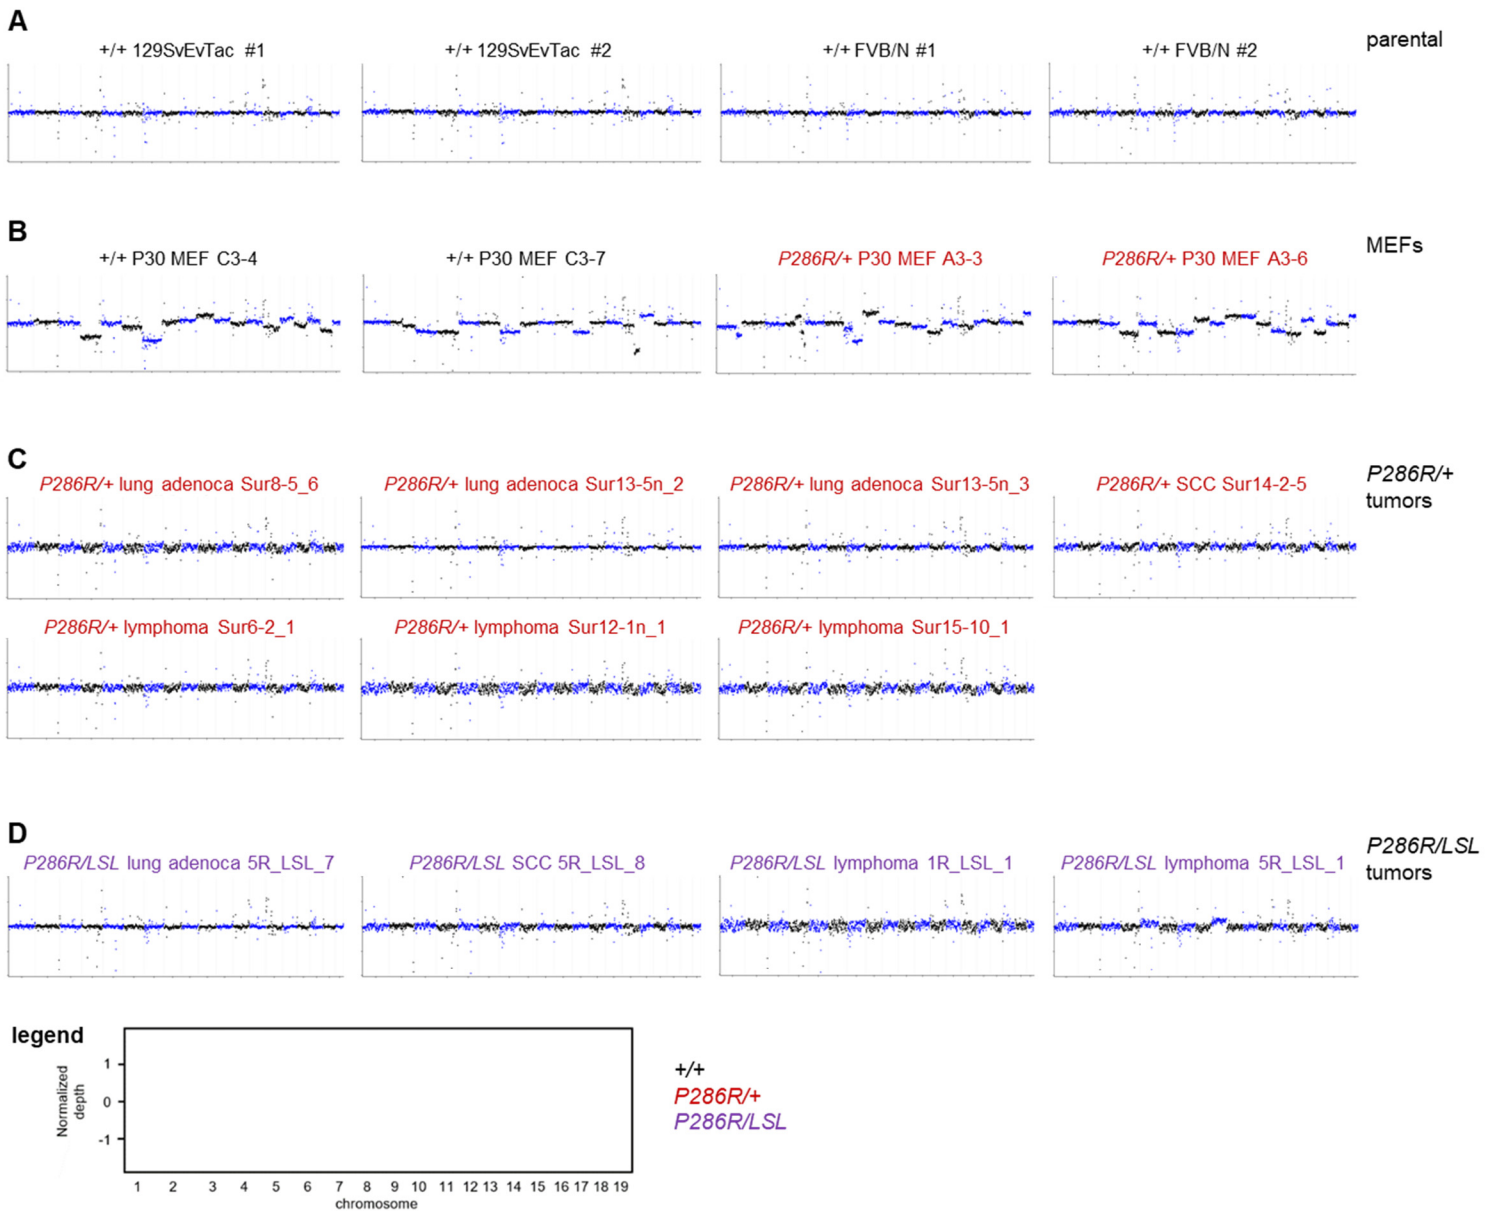

**Supplementary Fig. 4.** Copy number plots from WGS data (individual samples). For each sample the y-axis represents the normalized depth ( $\log_2(\text{depth}/\text{median depth across genome})$ ). The x-axis represents the position among the 19 autosomes as illustrated in the legend. The analysis shows that *Pole*<sup>P286R</sup> does not result in large-scale chromosomal copy-number instability. A) Parental mouse strains. B) Representative passage 30 MEF line clones. Some rearrangements occur during passaging of MEFs but these are qualitatively the same among wild-type and mutant MEFs. C) Tumors from *Pole*<sup>P286R/+</sup> mice. D) Tumors from *Pole*<sup>P286R/LSL</sup> (hemizygous) mice.

# Supplementary Figure 5.

## P286R/+ MEF line clones

P286R/+ P15 MEF A3-3 single cell clone

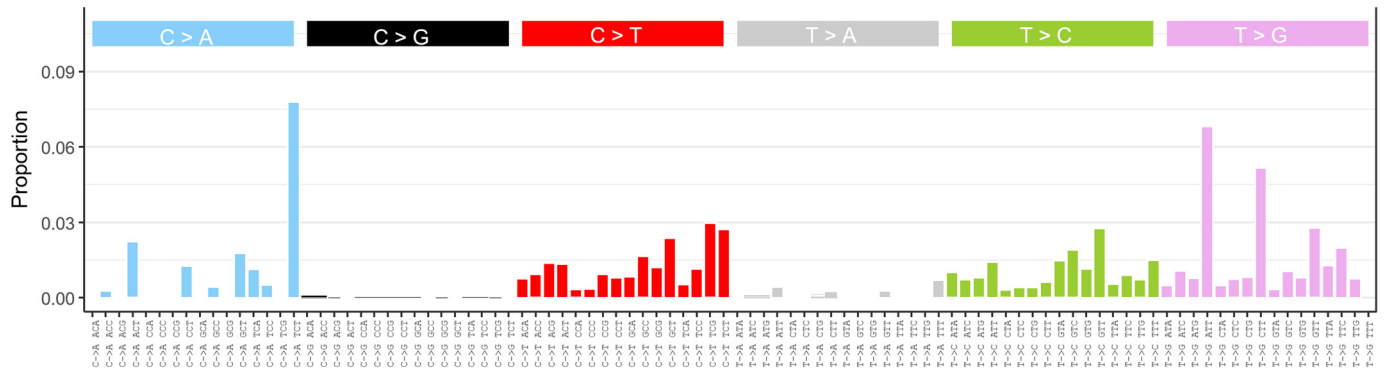

P286R/+ P30 MEF A3-3 single cell clone

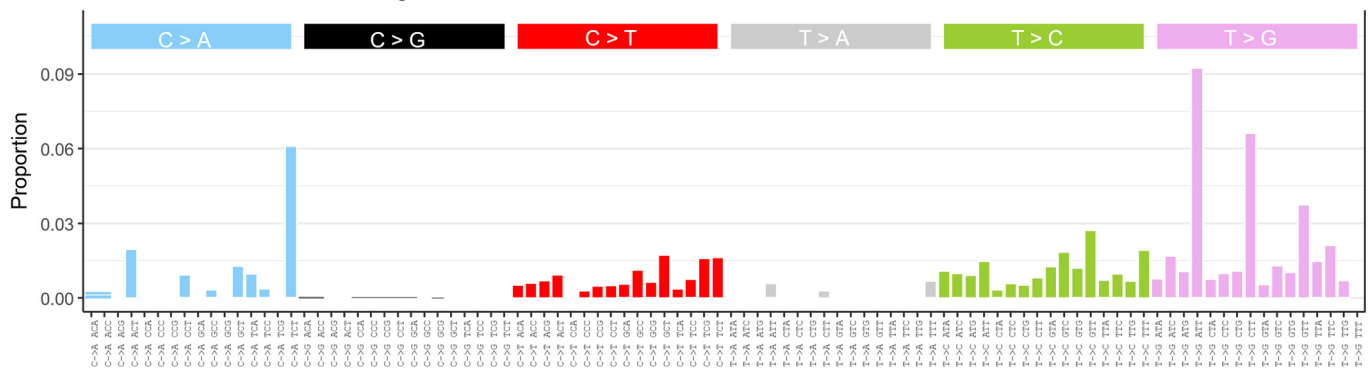

P286R/+ P15 MEF A3-6 single cell clone

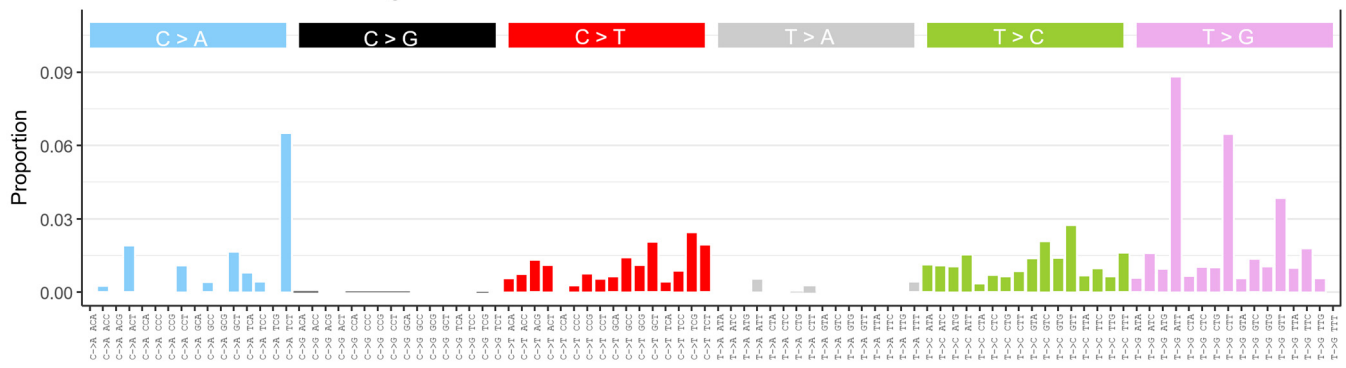

P286R/+ P30 MEF A3-6 single cell clone

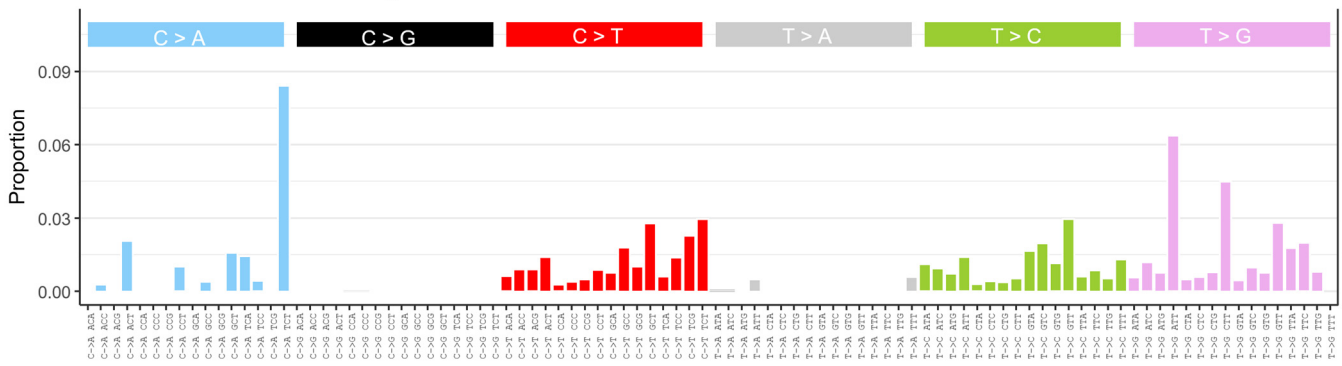

**Supplementary Fig. 5**

**P286R/+ MEF line clones *continued***

P286R/+ P15 MEF A3-8 single cell clone

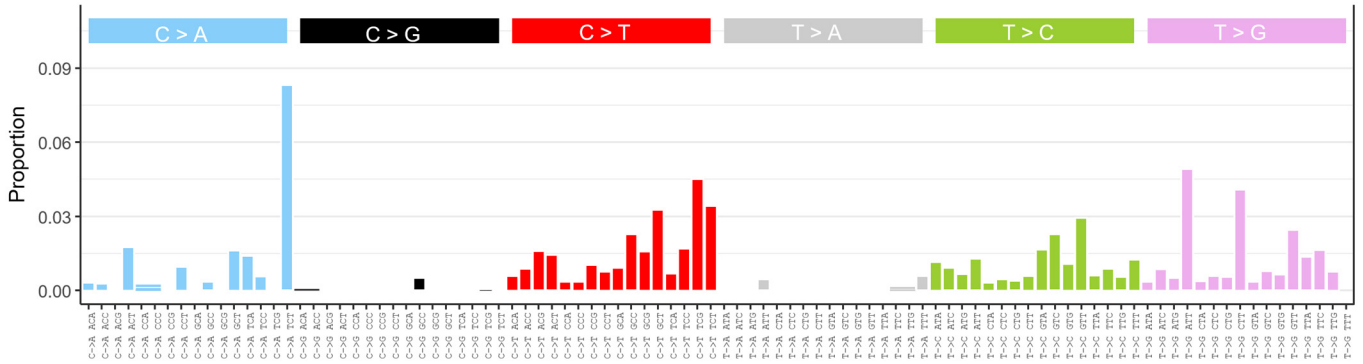

P286R/+ P30 MEF A3-8 single cell clone

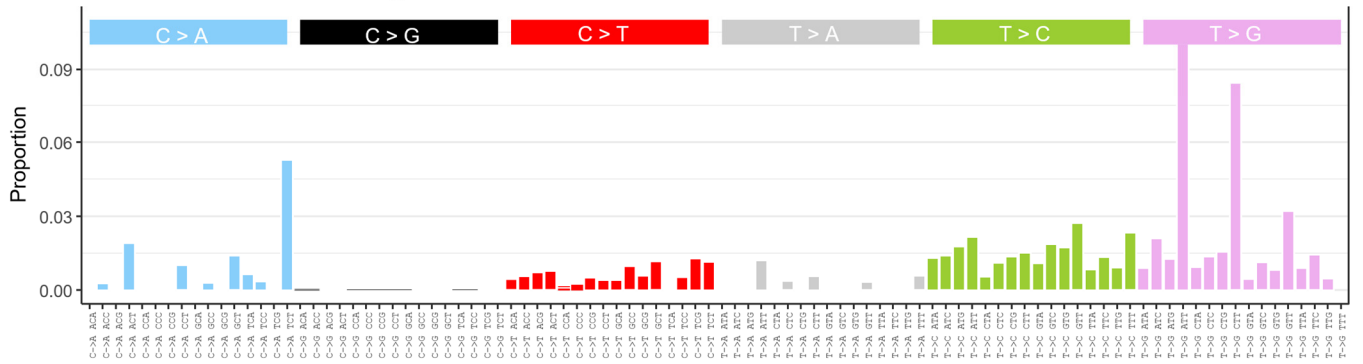

**P286R/LSL (hemizygous) tumors**

P286R/LSL lung adenocarcinoma 5R

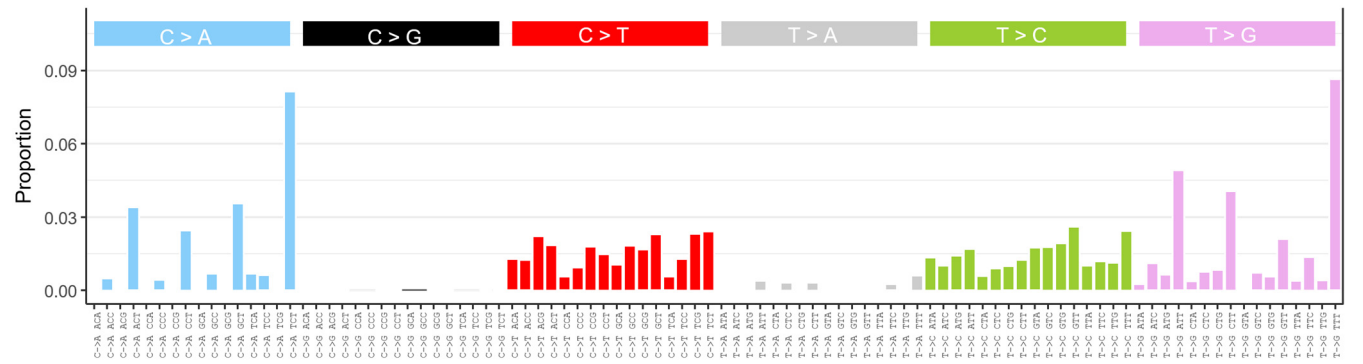

P286R/LSL lymphoma 1R

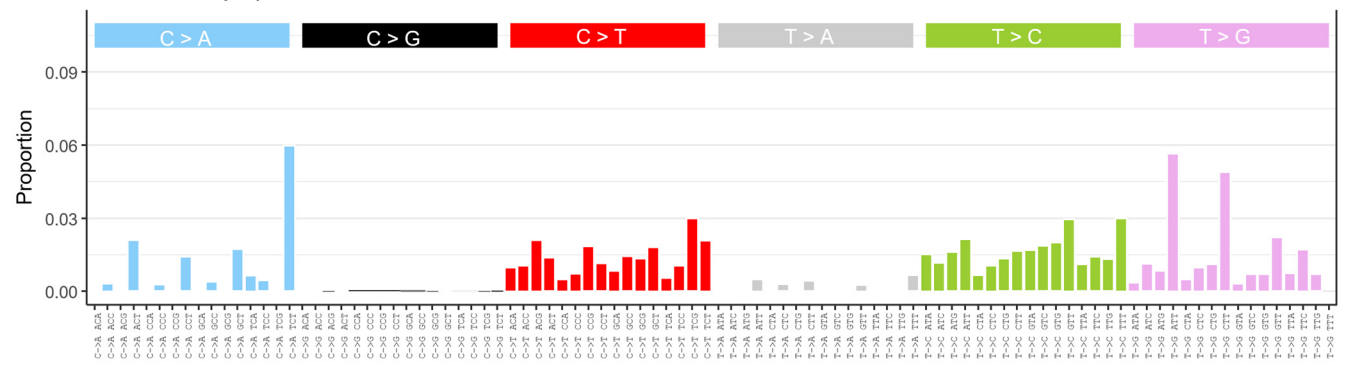

# Supplementary Fig. 5

## P286R/LSL (hemizygous) tumors *continued*

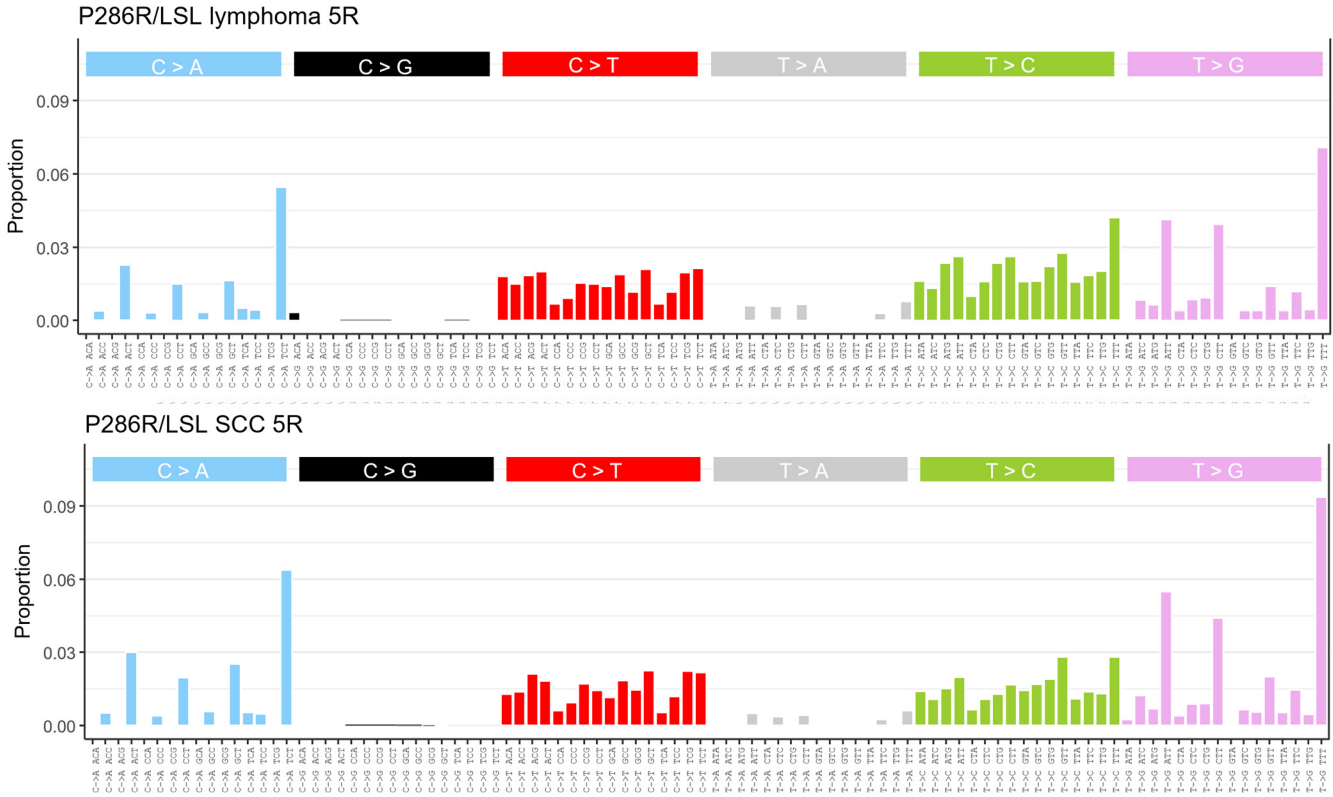

## +/+ MEF line clones

### +/+ P30 MEF C3-4 single cell clone

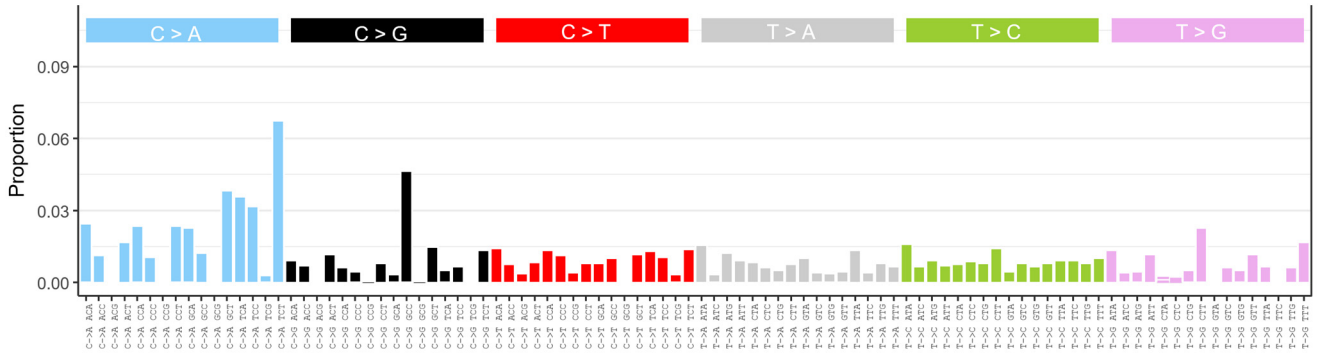

### +/+ P30 MEF C3-5 single cell clone

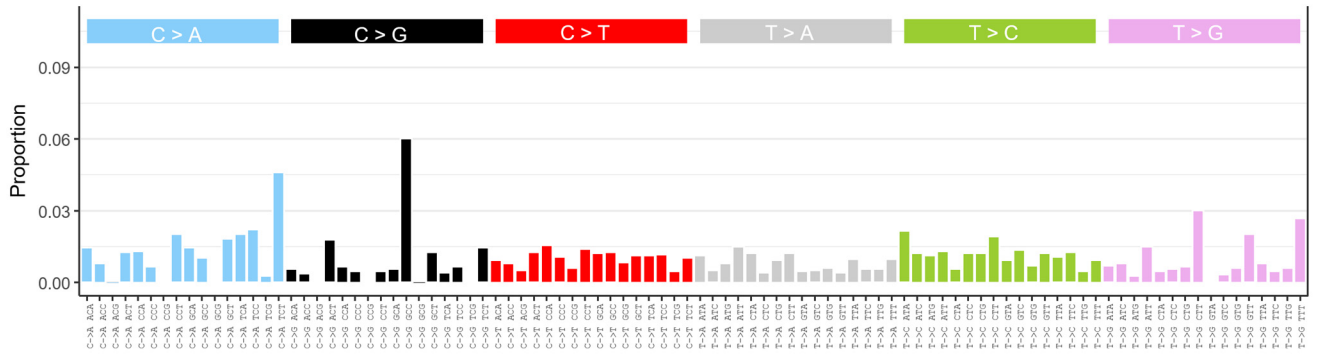

## Supplementary Fig. 5

### *+/+* MEF line clones *continued*

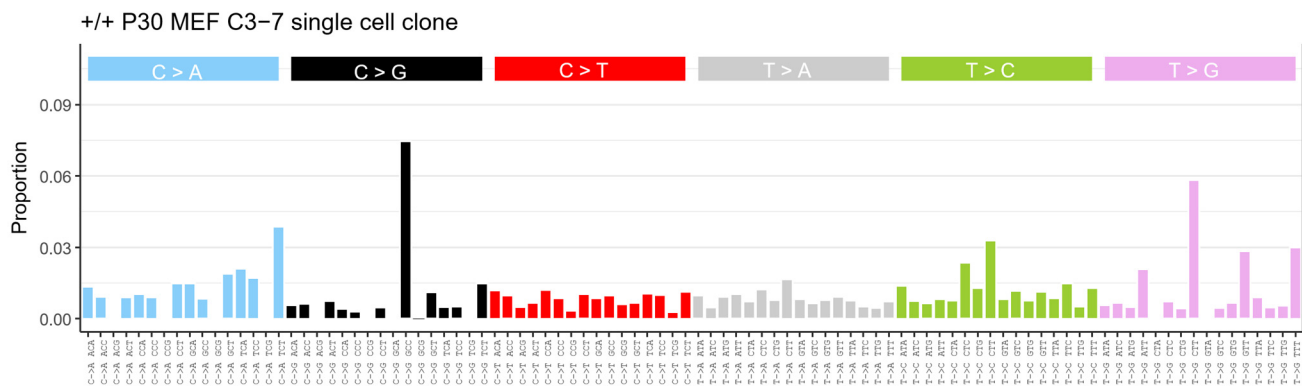

**Supplementary Fig. 5.** Whole genome sequencing-derived mutational signatures in *Pole*<sup>P286R/+</sup> (heterozygous) MEFs and tumors, and (hemizygous) *Pole*<sup>P286R/LSL</sup> tumors, and wild-type (*+/+*) MEFs. The 96 possible mutation types based on trinucleotide context are shown for each sample that underwent WGS in this study.
